# Supplementary material
Source: publisher figshare collection journal article supplement (https://acs.figshare.com/ndownloader/files/4725757)
Supplement: Supplementary file 1 [file 4725757]

## Supporting Information (T.C.R. Rocha et al.)

Additional TEM and High resolution TEM images showing the growth of anisotropic particles at **stage I** the reaction using 600 nm light and at the end of the reaction.

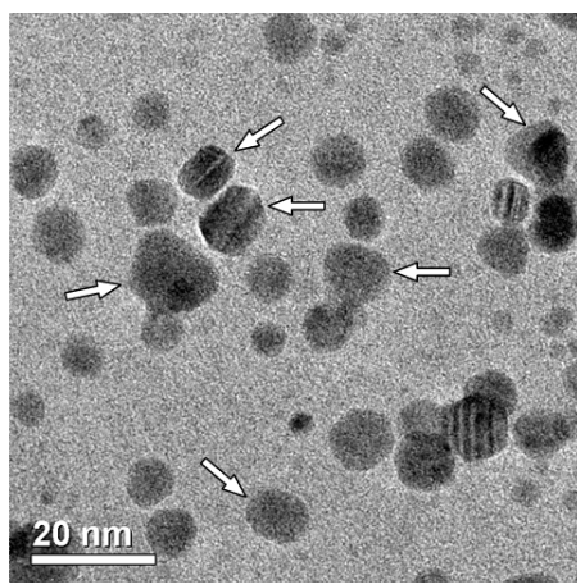

**Figure S1:** TEM images of anisotropic nanoparticles at stage **I-20**

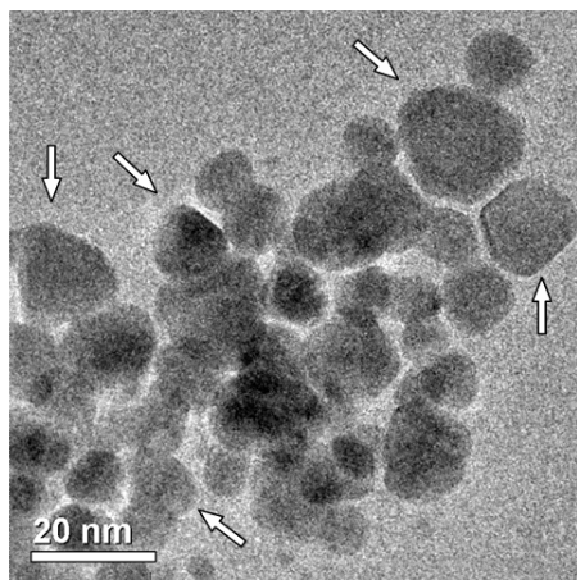

**Figure S2:** TEM images of anisotropic nanoparticles at stage **I-40**

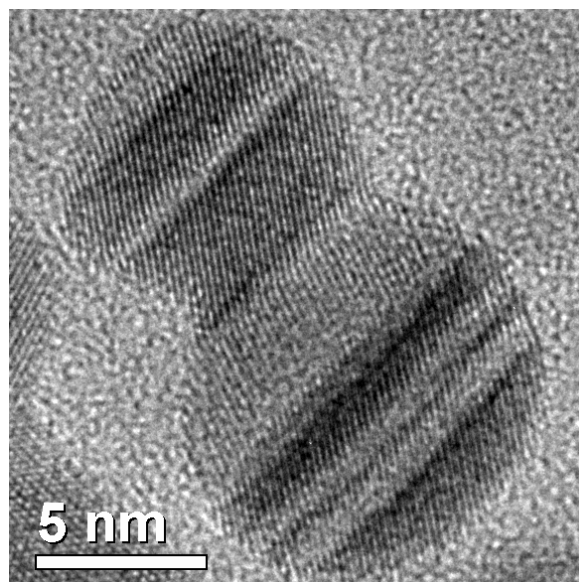

**Figure S3:** HRTEM images of anisotropic nanoparticles at stage **I-20**

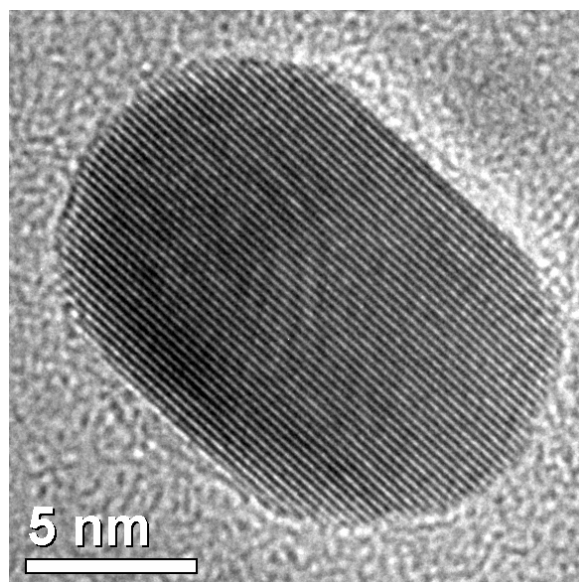

**Figure S4:** HRTEM images of anisotropic nanoparticles at stage **I-40**

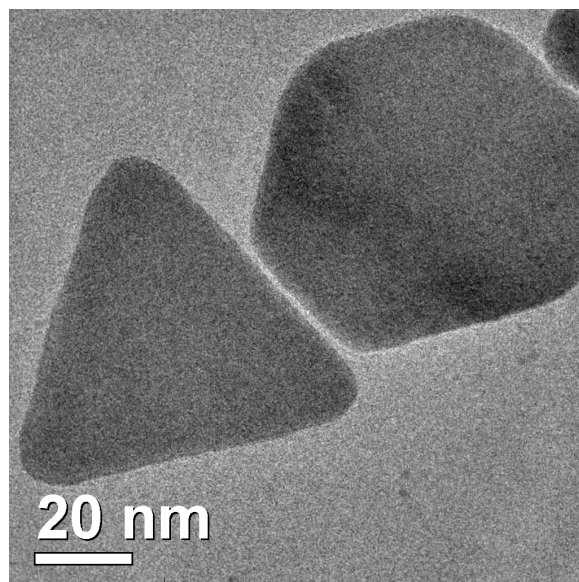

**Figure S5:** TEM image of hexagonal nanoplate at **II-240**
